# Supplementary material for: UDP-sugar pyrophosphorylase is essential for arabinose and xylose recycling, and is required during vegetative and reproductive growth in Arabidopsis
Source: PubMed Central journal article supplement (PMC3659416; doi:10.1111/tpj.12116), 2013-02-02

Supplement

Supplement Table S1

| Primer                       | Sequence                              |
|------------------------------|---------------------------------------|
| attB1-USP                    | AAAAAGCAGGCTTCATGGCTTCTACGGTTGATTC    |
| attB2-AtUSP-with-stop        | GAAAGCTGGGTTCAATCTTCAACAGAAAATTTGCC   |
| attB2-AtUSP-without-stop     | GAAAGCTGGGTATCTTCAACAGAAAATTTGCCA     |
| attB1-UDP-GlcDH              | AAAAAGCAGGCTTCATGGTGAAGATTTGCTGCAT    |
| attB2-UDP-GlcDH-with-stop    | GAAAGCTGGGTTATGCCACAGCAGGCAT          |
| attB2-UDP-GlcDH-without-stop | GAAAGCTGGGTTGCCACAGCAGGCATGT          |
| attB1-UGPase                 | AAAAAGCAGGCTTCATGCGTTATGCGGTATATTCTTT |
| attB2-UGPase-with-stop       | GAAAGCTGGGTTACAGATCCTCTGGACCGT        |
| attB2-UGPase-without-stop    | GAAAGCTGGGTCAGATCCTCTGGACCGTTGA       |
| attB1-adaptor                | GGGGACAAGTTTGTACAAAAAAGCAGGCTTC       |
| attB2-adaptor                | GGGGACCACTTTGTACAAGAAAGCTGGGT         |
| Salk_092647-T-DNA            | TGAGCAAGTGTGGATTTCTACTA               |
| Salk_030169-T-DNA            | ATTGTCTTCCATTTTCGTGATCTG              |
| USP-WT-Salk_030169F          | ATTGTCTTCCATTTTCGTGATCTG              |
| USP-WT-Salk_030169R          | TGAGCAAGTGTGGATTTCTACTA               |
| USP-WT-Salk_092647F          | GCTACAGGTAACCGATCTTCTC                |
| USP-WT-Salk_092647R          | GCTCTTTCGCAGTCTTAATGTATG              |
| Salk-LB                      | CGTGGACCGCTTGCTGCAACT                 |
| pMiox4-F                     | TAAGCTTCATAGTCGAGCAAGAAGTTCAA         |
| pMiox4-R                     | TACTAGTCTTTTCGAAGAAAGTTTTTAAAAGAG     |
| pLAT52-F                     | TAAGCTTAATCAAATCAAAAAGAAAATGA         |
| pLAT52-R                     | TACTAGTTCTTTTATTAGAGATTTTTGTTTTGTTTT  |
| pUbq10-F                     | TAAGCTTCTTATAAGTTACAAACC              |
| pUbq10-R                     | TACTAGTCTTGATCACGGTAGAGAGAATTG        |

Suppl. Fig. S1 (Gene expression) The AtGenexpress microarray dataset was analyzed for expression of genes involved in the recycling pathway to nucleotide sugars. The maximum value for the organs root, rosette leaves, shoot, flower and stamen was set to 100% and is represented as a heat map by dark blue squares.

Suppl. Fig. S2

Separation and staining of AGPs. Total AGPs were separated on an agarose gel and stained with

Yariv. (1) wild type; (2) *ara1-1*; (3) *kd-usp*.

*Arabidopsis thaliana*

- callus
- cell culture / primary cell
  - sperm cell
- seedling
  - cotyledons
  - hypocotyl
  - radicle
  - imbibed seed
- inflorescence
  - flower
    - carpel
      - ovary
      - stigma
    - petal
    - sepal
    - stamen
      - pollen
      - abscission zone
    - pedicel
  - silique
  - seed
    - embryo
    - endosperm
      - micropylar endosperm
      - peripheral endosperm
      - chalazal endosperm
    - testa (seed coat)
      - general seed coat
      - chalazal seed coat
    - suspensor
  - stem
  - node
  - shoot apex
  - cauline leaf
- rosette
  - juvenile leaf
  - adult leaf
  - petiole
  - senescent leaf
  - hypocotyl
    - xylem
    - cork
  - leaf primordia
  - stem
- roots
  - lateral root
  - root hair zone
  - root tip
  - elongation zone
  - endodermis
  - endodermis+cortex
  - epid. atrichoblasts
  - lateral root cap
  - stele

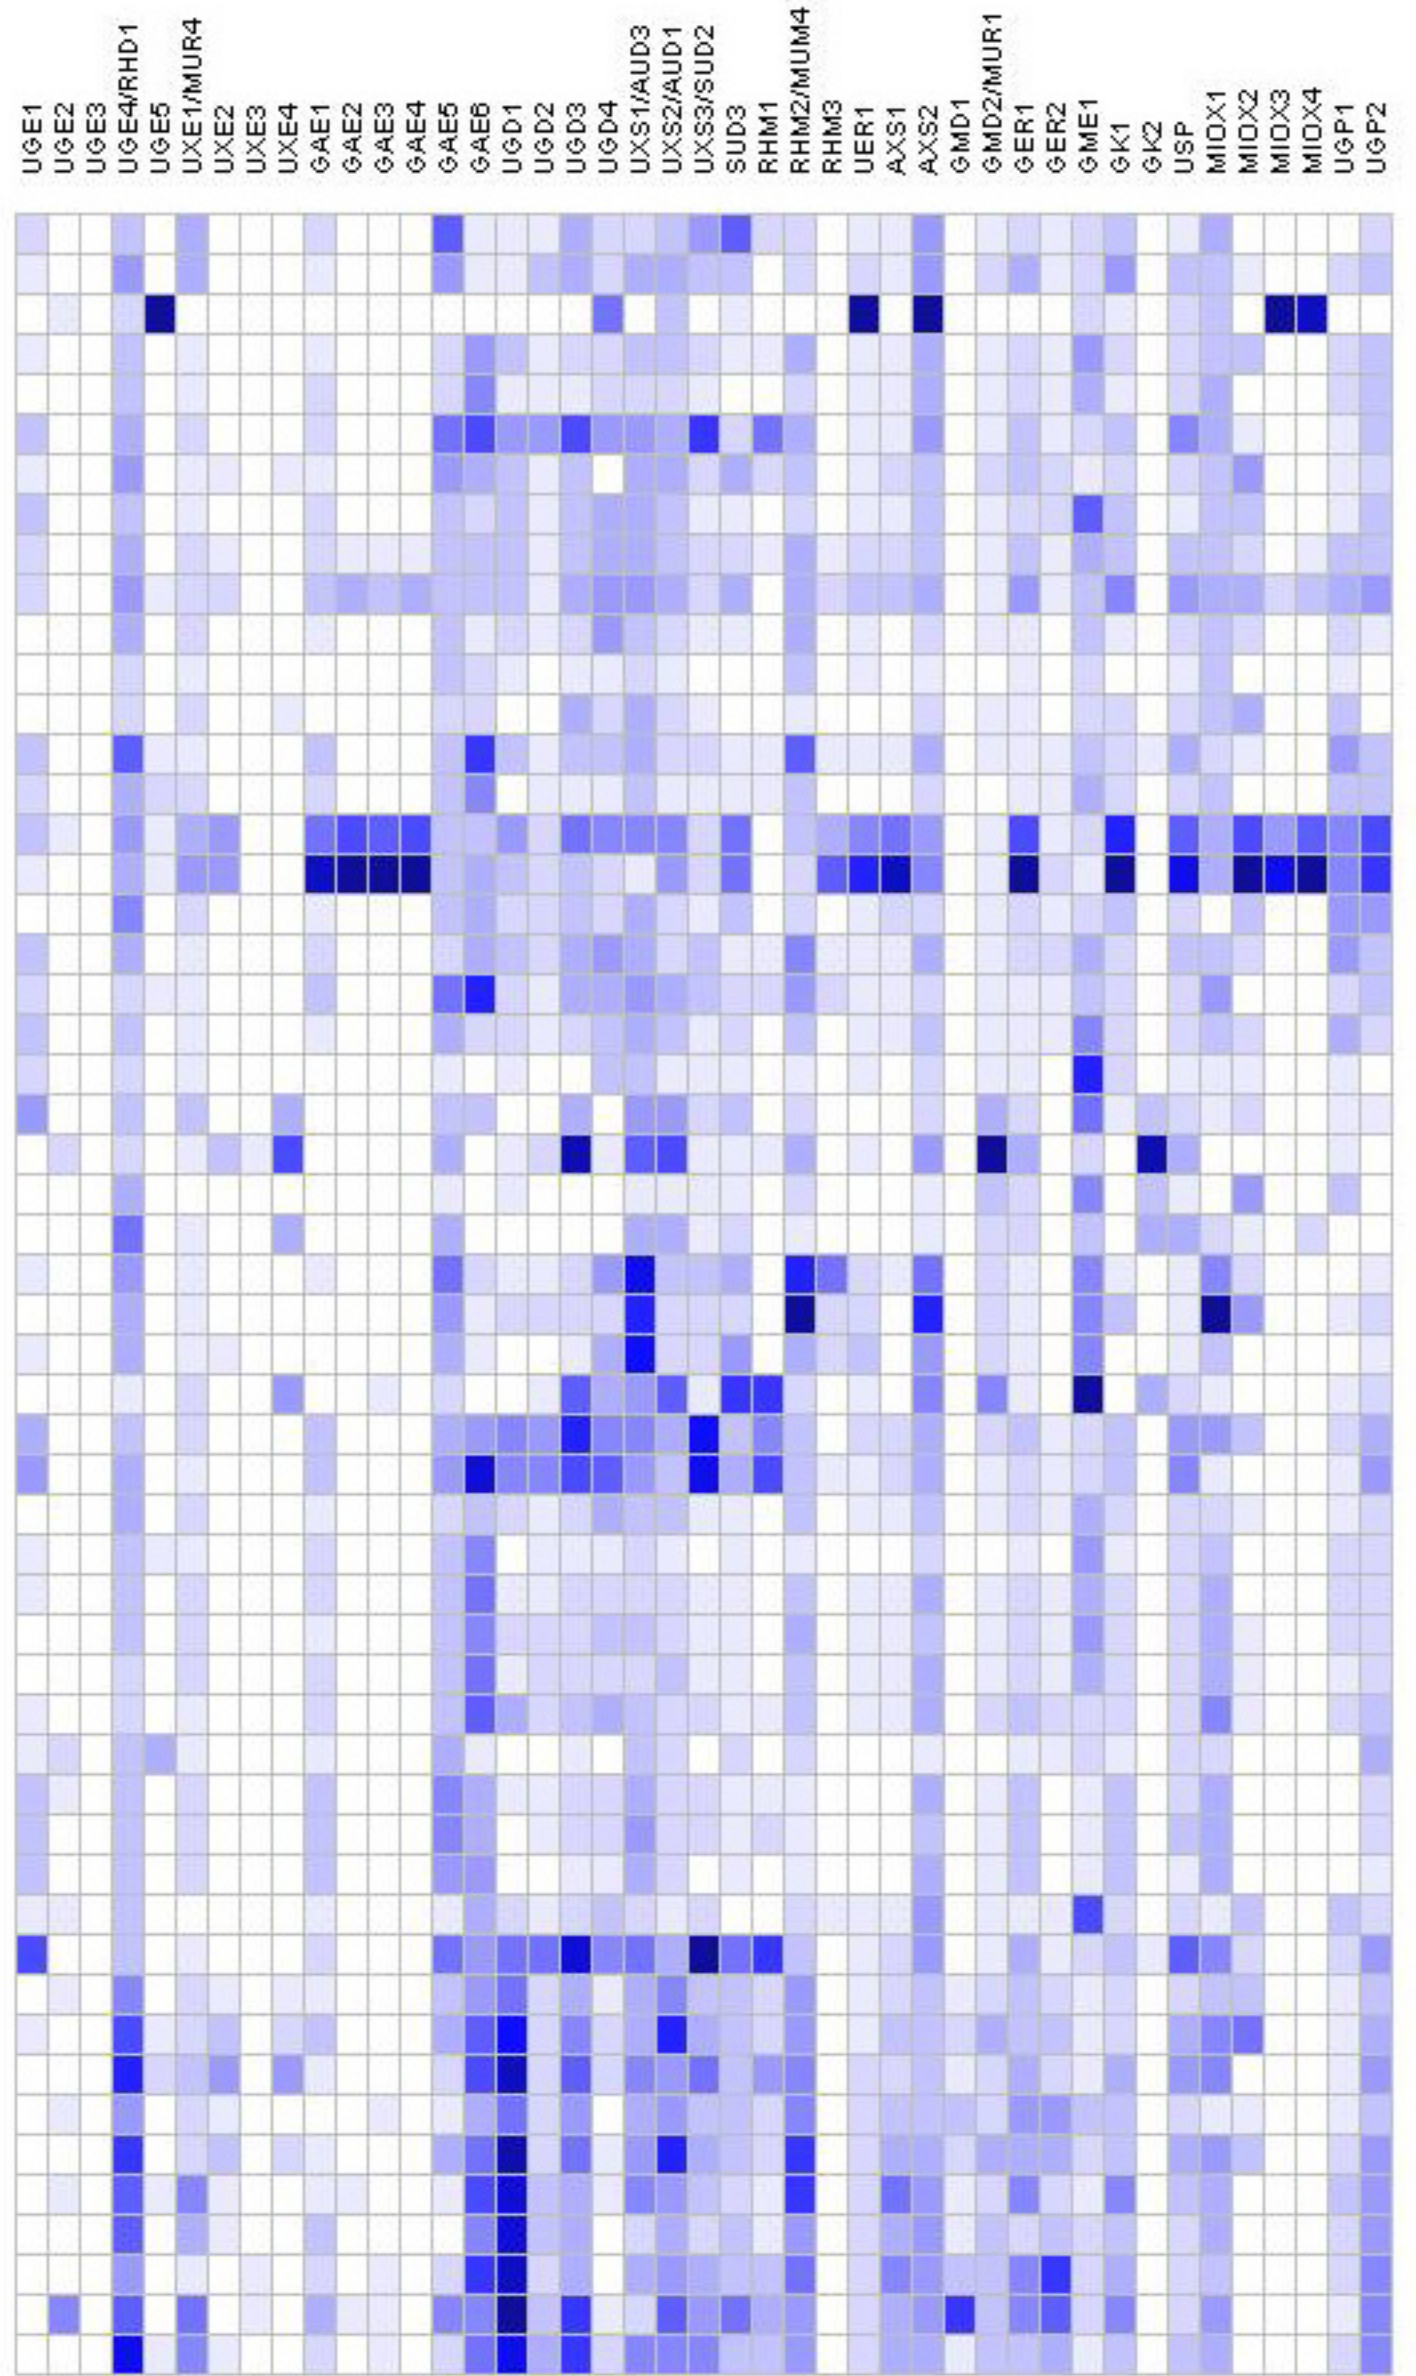

- arrays**
- 6
  - 130
  - 3
  - 1195
  - 9
  - 6
  - 23
  - 26
  - 718
  - 216
  - 15
  - 4
  - 3
  - 6
  - 6
  - 87
  - 32
  - 14
  - 3
  - 17
  - 179
  - 15
  - 22
  - 2
  - 4
  - 5
  - 12
  - 2
  - 6
  - 2
  - 46
  - 3
  - 175
  - 3
  - 1234
  - 131
  - 482
  - 12
  - 3
  - 39
  - 9
  - 9
  - 3
  - 3
  - 3
  - 3
  - 3

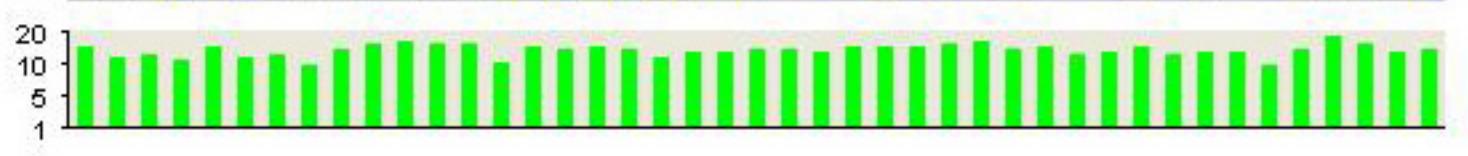



*Fig. S2*

1

2

3

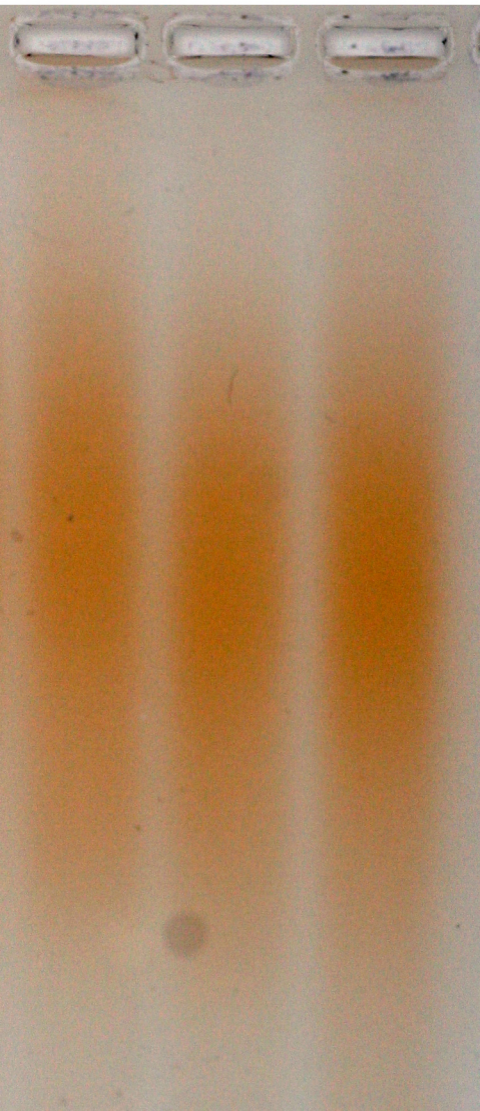

Supplement: tpj0074-0239-SD1.pdf [file tpj0074-0239-SD1.pdf]
